# Supplementary material
Source: PubMed Central journal article supplement (PMC10699483)

## **Online Supplement**

### **Augmentation Therapy for Alpha-1 Antitrypsin Deficiency: Patient Experiences with Self-Infusion, Home Providers, and Clinics**

Charlie Strange, MD<sup>1,2</sup> Sheri Allison<sup>2</sup> Jean McCathern<sup>2</sup> Robert A. Sandhaus, MD, PhD<sup>2,3</sup> Kristen E. Holm, PhD, MPH<sup>2,3</sup>

<sup>1</sup> Medical University of South Carolina, Charleston, South Carolina, United States

<sup>2</sup> AlphaNet, Inc., Coral Gables, Florida, United States

<sup>3</sup> National Jewish Health, Denver, Colorado, United States

Additional graphics of interesting findings from our research are included in this supplemental material that demonstrates the infusion practices of the AlphaNet population.

**Figure S1.** Time on infusion therapy is influenced by the age of the individual (N=5266). Age is correlated with time on therapy ( $R^2= 0.04$ ,  $p<0.001$ ). The mean age at initiation of alpha-1 augmentation therapy is 60 years.

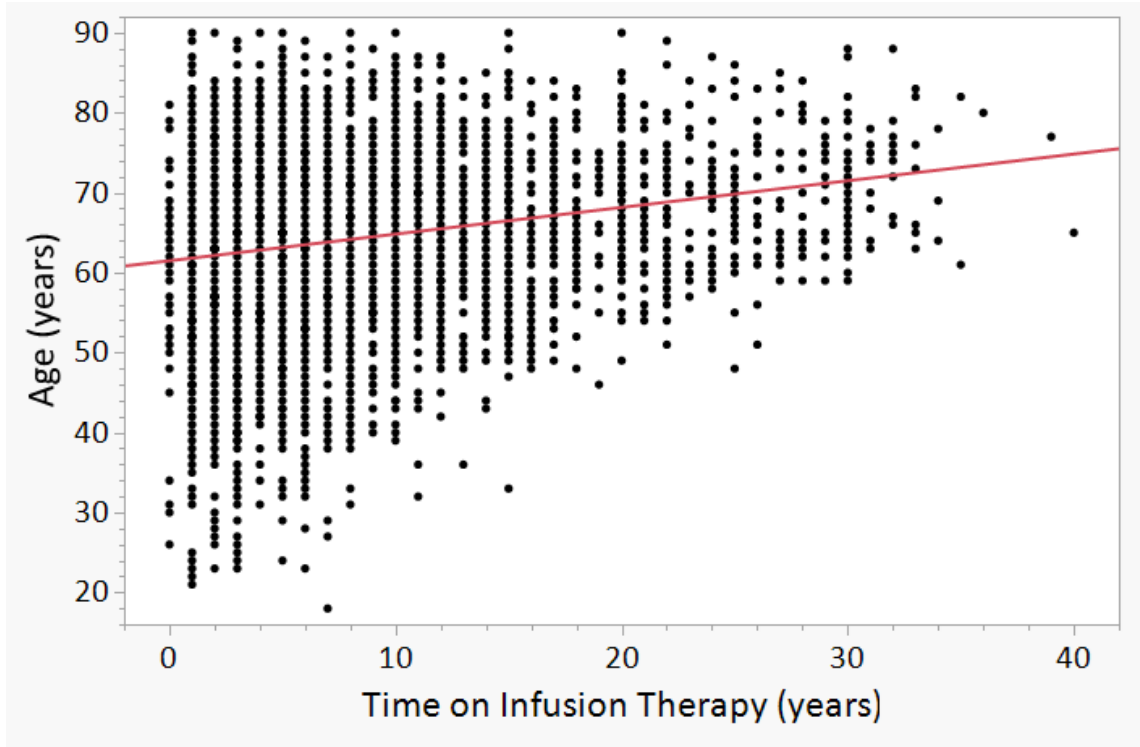

**Figure S2.** Duration of Self-Infusion among those currently Self-Infusing (N= 422).

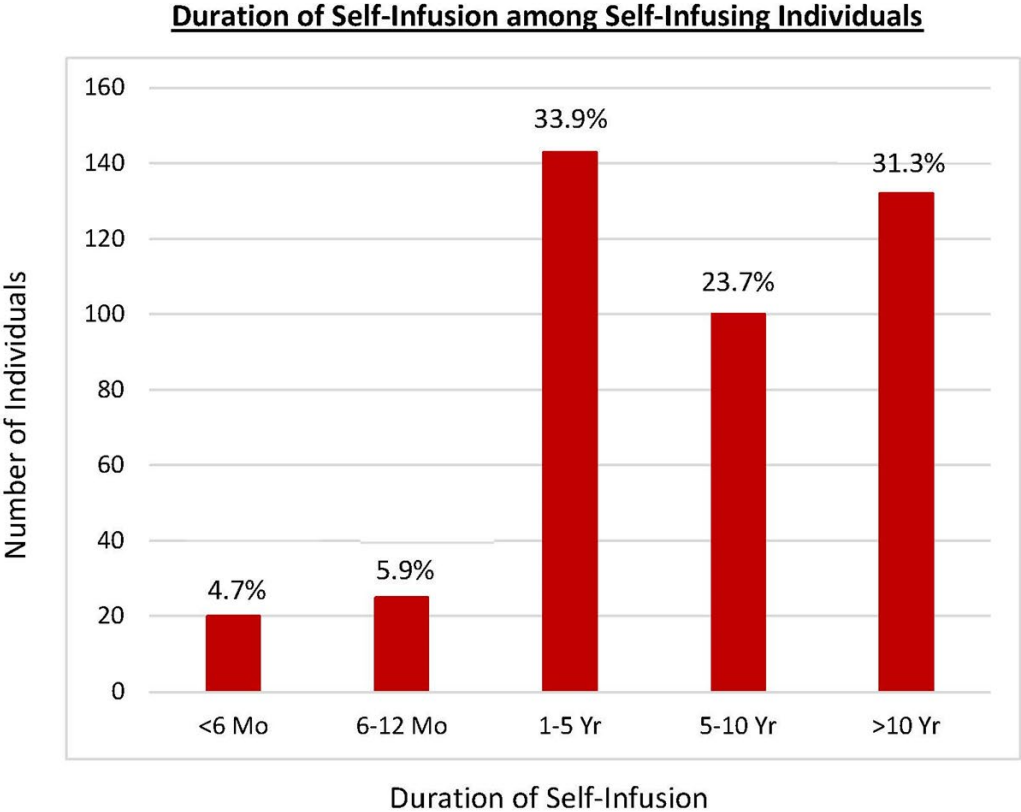

Figure S3. How Self-Infusers first heard about the technique (N= 422).

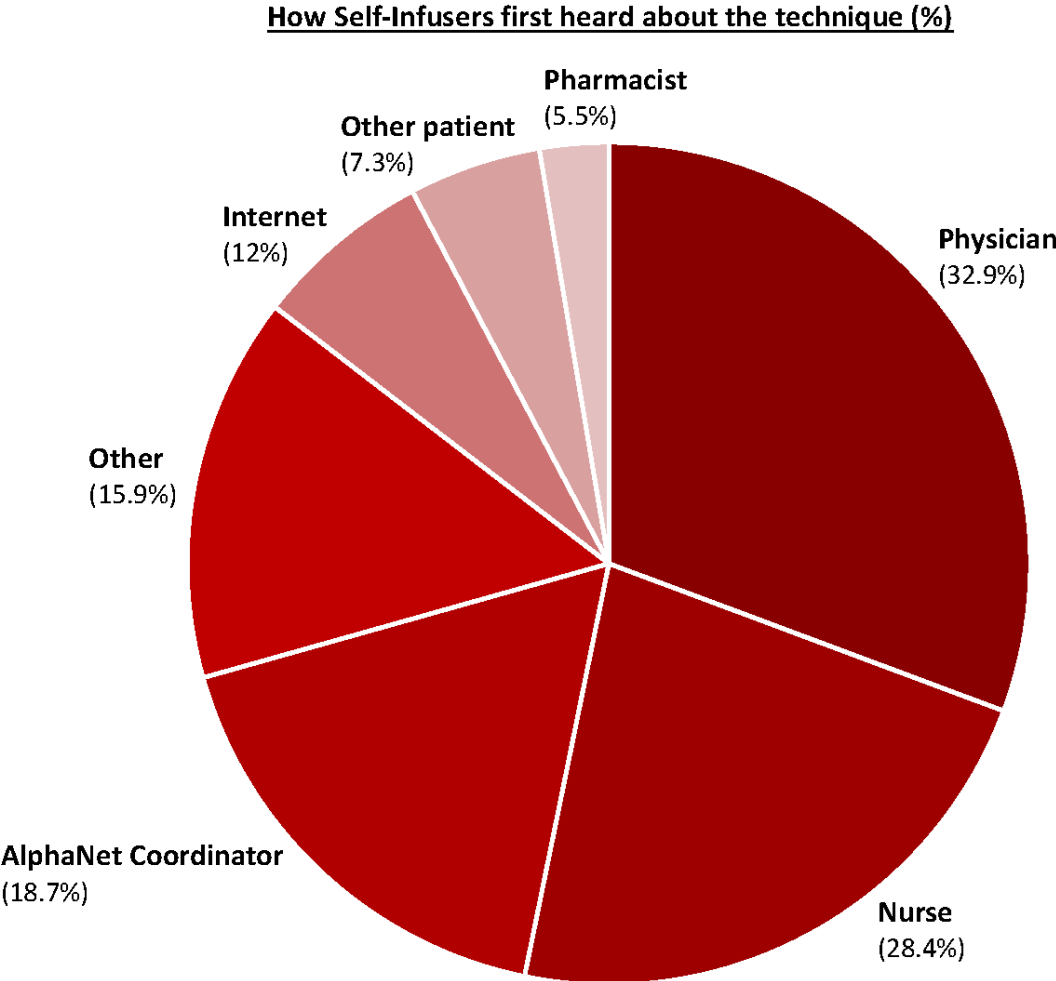

**Figure S4.** The onboarding process in learning self-infusion (N= 422).

**Who primarily trained you to self-administer?**

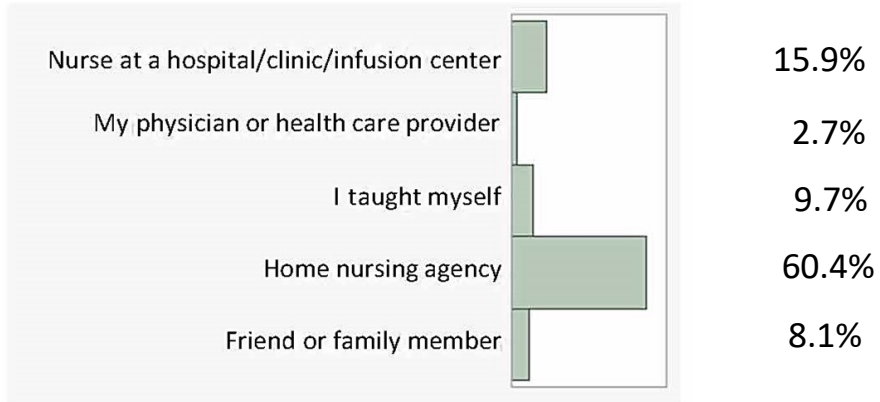

**How many training sessions did you have while learning?**

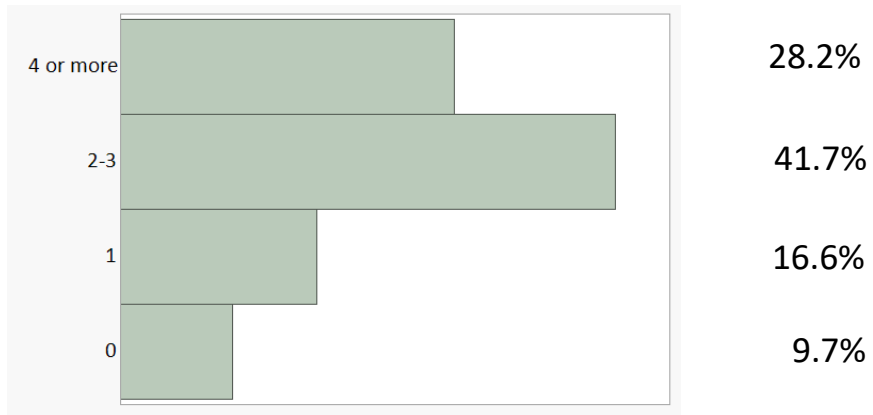

**How long had you been on augmentation before you started?**

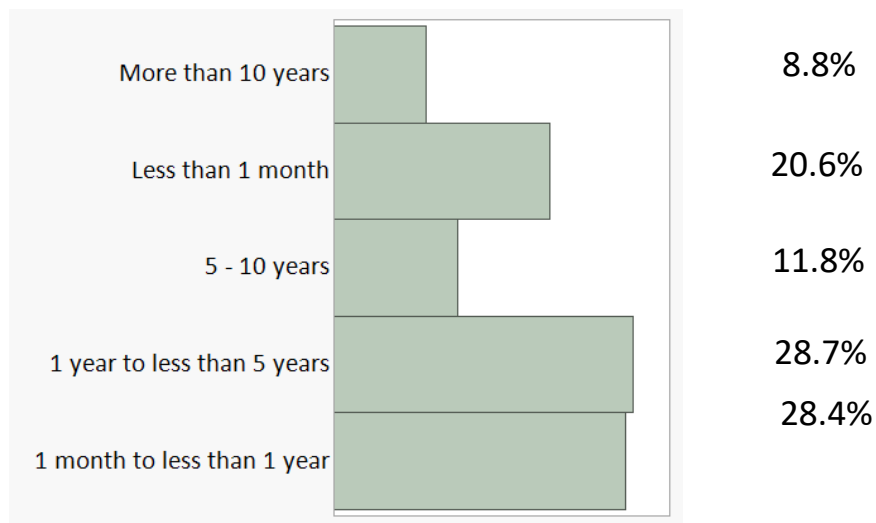

Supplement: JCOPDF-10-392-s001.pdf [file JCOPDF-10-392-s001.pdf]
